# Supplementary material
Source: HighWire-hosted journal article supplement (https://bjgpopen.org/content/suppl/2025/05/29/BJGPO.2025.0023)
Supplement: MDC_10.3399BJGPO.2025.0023_supp_v1.pdf [file MDC_10.3399BJGPO.2025.0023_supp_v1.pdf]

PRESCRIBING MEMANTINE IN GENERAL PRACTICE IN ENGLAND: A SURVEY AND INTERVIEW STUDY

SUPPLEMENTARY MATERIAL

SUPPLEMENTARY TABLE 1: SURVEY RESULTS

GP & PRACTICE DETAILS

|                                           | Frequency | Percent | Cumulative |
|-------------------------------------------|-----------|---------|------------|
| <b>Q2 Gender</b>                          |           |         |            |
| Male                                      | 50        | 48.08   | 48.08      |
| Female                                    | 51        | 49.04   | 97.12      |
| Prefer not to say                         | 3         | 2.88    | 100.00     |
| Total                                     | 104       | 100.00  |            |
| <b>Q3 Years as GP</b>                     |           |         |            |
| 0-4                                       | 12        | 11.54   | 11.54      |
| 5-9                                       | 24        | 23.08   | 34.62      |
| 10-14                                     | 23        | 22.12   | 56.73      |
| 15-19                                     | 13        | 12.50   | 69.23      |
| 20-24                                     | 12        | 11.54   | 80.77      |
| 25+                                       | 20        | 19.23   | 100.00     |
| Total                                     | 104       | 100.00  |            |
| <b>Q4 Number of sessions per week</b>     |           |         |            |
| 1-2                                       | 9         | 8.65    | 8.65       |
| 3-4                                       | 23        | 22.12   | 30.77      |
| 5-7                                       | 53        | 50.96   | 81.73      |
| 8+                                        | 16        | 15.38   | 97.12      |
| Total                                     | 104       | 100.00  |            |
| <b>Q5 Locum</b>                           |           |         |            |
| No                                        | 78        | 75.00   | 75.00      |
| Yes                                       | 26        | 25.00   | 100.00     |
| Total                                     | 104       | 100.00  |            |
| <b>Q6 Specialist interest in dementia</b> |           |         |            |
| No                                        | 73        | 70.19   | 70.19      |
| Yes                                       | 31        | 29.81   | 100.00     |
| Total                                     | 104       | 100.00  |            |
| <b>Q7 Region</b>                          |           |         |            |
| SW England                                | 26        | 25.00   | 25.00      |
| East Midlands                             | 4         | 3.85    | 28.85      |
| East of England                           | 10        | 9.62    | 38.46      |
| London                                    | 20        | 19.23   | 57.69      |
| NE England                                | 2         | 1.92    | 59.62      |
| NW England                                | 21        | 20.19   | 79.81      |
| SE England                                | 9         | 8.65    | 88.46      |
| West Midlands                             | 4         | 3.85    | 92.31      |
| Yorkshire                                 | 7         | 6.73    | 99.04      |
| Total                                     | 104       | 100.00  |            |

| <b>Q8 Number of GPs in practice</b> |     |        |       |
|-------------------------------------|-----|--------|-------|
| 1-5                                 | 20  | 19.23  | 19.23 |
| 6-10                                | 49  | 47.12  | 66.35 |
| 11-15                               | 25  | 24.04  | 90.38 |
| 16-20                               | 2   | 1.92   | 92.31 |
| 21-25                               | 4   | 3.85   | 96.15 |
| 26-30                               | 3   | 2.88   | 99.04 |
| Total                               | 104 | 100.00 |       |

**GP CONFIDENCE (HOW CONFIDENT ARE YOU..?)**

| <b>Q9 Developing a care plan for patients with mild AD?</b> |     |        |       |
|-------------------------------------------------------------|-----|--------|-------|
| Very confident                                              | 22  | 21.15  | 21.15 |
| Confident                                                   | 31  | 29.81  | 50.96 |
| Moderately confident                                        | 36  | 34.62  | 85.58 |
| Somewhat unconfident                                        | 11  | 10.58  | 96.15 |
| Unconfident                                                 | 3   | 2.88   | 99.04 |
| Total                                                       | 104 | 100.00 |       |

| <b>Q10 Developing a care plan for patients with moderate to severe AD?</b> |     |        |       |
|----------------------------------------------------------------------------|-----|--------|-------|
| Very confident                                                             | 19  | 18.27  | 18.27 |
| Confident                                                                  | 25  | 24.04  | 42.31 |
| Moderately confident                                                       | 38  | 36.54  | 78.85 |
| Somewhat unconfident                                                       | 13  | 12.50  | 91.35 |
| Unconfident                                                                | 8   | 7.69   | 99.04 |
| Total                                                                      | 104 | 100.00 |       |

| <b>Q11 Deciding whether a person with AD is at the moderate or severe stage of the disease?</b> |     |        |       |
|-------------------------------------------------------------------------------------------------|-----|--------|-------|
| Very confident                                                                                  | 14  | 13.46  | 13.46 |
| Confident                                                                                       | 27  | 25.96  | 39.42 |
| Moderately confident                                                                            | 41  | 39.42  | 78.85 |
| Somewhat unconfident                                                                            | 20  | 19.23  | 98.08 |
| Unconfident                                                                                     | 1   | 0.96   | 99.04 |
| Total                                                                                           | 104 | 100.00 |       |

**GP EXPERIENCE (HOW FREQUENTLY HAVE YOU..?)**

| <b>Q12 Conducted an annual review with a patient with moderate to severe AD?</b> |     |        |       |
|----------------------------------------------------------------------------------|-----|--------|-------|
| Never                                                                            | 7   | 6.73   | 6.73  |
| Rarely                                                                           | 15  | 14.42  | 21.15 |
| Occasionally                                                                     | 38  | 36.54  | 57.69 |
| Regularly                                                                        | 43  | 41.35  | 99.04 |
| Total                                                                            | 104 | 100.00 |       |

| <b>Q13 Initiated a prescription for memantine for a patient with moderate to severe AD?</b> |     |        |       |
|---------------------------------------------------------------------------------------------|-----|--------|-------|
| Never                                                                                       | 58  | 55.77  | 55.77 |
| Rarely                                                                                      | 16  | 15.38  | 71.15 |
| Occasionally                                                                                | 14  | 13.46  | 84.62 |
| Regularly                                                                                   | 15  | 14.42  | 99.04 |
| Total                                                                                       | 104 | 100.00 |       |
| <b>Q14 Continued a prescription for memantine for a patient with moderate to severe AD?</b> |     |        |       |
| Never                                                                                       | 3   | 2.88   | 2.88  |
| Rarely                                                                                      | 8   | 7.69   | 10.58 |
| Occasionally                                                                                | 26  | 25.00  | 35.58 |
| Regularly                                                                                   | 66  | 63.46  | 99.04 |
| Total                                                                                       | 104 | 100.00 |       |
| <b>Q15 Referred a patient with moderate to severe AD to a specialist?</b>                   |     |        |       |
| Never                                                                                       | 2   | 1.92   | 1.92  |
| Rarely                                                                                      | 10  | 9.62   | 11.54 |
| Occasionally                                                                                | 43  | 41.35  | 52.88 |
| Regularly                                                                                   | 48  | 46.15  | 99.04 |
| Total                                                                                       | 104 | 100.00 |       |

#### GP ACCESS TO SPECIALIST ADVICE

| <b>Q16 Do you have access to a specialist for advice with respect to caring for patients with moderate to severe AD?</b> |     |        |       |
|--------------------------------------------------------------------------------------------------------------------------|-----|--------|-------|
| Yes, a specialist within my practice                                                                                     | 11  | 10.58  | 10.58 |
| Yes, a local specialist within primary care                                                                              | 10  | 9.62   | 20.19 |
| Yes, a local specialist in secondary care                                                                                | 72  | 69.23  | 89.42 |
| No, I have no access to specialist advice                                                                                | 6   | 5.77   | 95.19 |
| Other*                                                                                                                   | 4   | 3.85   | 99.04 |
| Total                                                                                                                    | 104 | 100.00 |       |

**\*Other:** Frailty team, mental health team; I lead the frailty service, so people may discuss patients with myself / the frailty team. We have local access to the CMHT (Community Mental Health Team) but they have staffing issues and often do not have a consultant; I am a GPwER (GP with Extended Role) dementia and work in MAS (Memory Assessment Service); Older people's mental health team.

#### GP KNOWLEDGE

| <b>Q18 Are you aware that NICE guideline NG97 recommends that memantine for moderate to severe AD can be initiated in primary care?</b> |     |        |       |
|-----------------------------------------------------------------------------------------------------------------------------------------|-----|--------|-------|
| No                                                                                                                                      | 48  | 46.15  | 46.15 |
| Yes                                                                                                                                     | 55  | 52.88  | 99.04 |
| Total                                                                                                                                   | 104 | 100.00 |       |

**TOPIC GUIDE FOR MEMANTINE INTERVIEWS  
PRESCRIBING MEMANTINE IN GENERAL PRACTICE IN ENGLAND**

Researcher: Dr Mary Carter

| Question & prompt                                                                                                                                                                                                                                                                                                                                                                                                                |
|----------------------------------------------------------------------------------------------------------------------------------------------------------------------------------------------------------------------------------------------------------------------------------------------------------------------------------------------------------------------------------------------------------------------------------|
| <p>1. What is your experience of caring and prescribing for patients with AD?</p> <p><i>PROMPT</i></p> <p><i>Explore challenges, differences between mild/moderate/severe AD, any special interest in dementia</i></p>                                                                                                                                                                                                           |
| <p>2. Are you confident about deciding whether a patient has mild, moderate or severe AD?</p> <p><i>PROMPT</i></p> <p><i>Do GPs and carers/patients have a shared definition of mild/moderate/severe? What might help you with identifying the severity of AD? Are the existing tools (MMSE, GPCOG etc.) helpful?</i></p>                                                                                                        |
| <p>3. How difficult/easy is giving news of a possible AD diagnosis to patients and families?</p> <p><i>PROMPT</i></p> <p><i>Are you able to signpost patient/family to other sources of help so that they can make informed decisions? Are carers registered?</i></p>                                                                                                                                                            |
| <p>4. How often do you review patients with AD?</p> <p><i>PROMPT</i></p> <p><i>Do you think this is enough? Do you review carers?</i></p>                                                                                                                                                                                                                                                                                        |
| <p>5. What is your experience of prescribing memantine for moderate to severe AD?</p> <p><i>PROMPT</i></p> <p><i>Explore reasons for prescribing/not prescribing, eg time, cost, role of GP and specialist services, efficacy/safety/tolerability of memantine, prescribing memantine alone/in combination with cholinesterase inhibitors, other medications, do you discuss medications routinely with patients/carers?</i></p> |
| <p>6. How has your prescribing practice been impacted by NICE guidance NG97 about prescribing memantine in general practice for moderate to severe AD?</p> <p><i>PROMPT</i></p> <p><i>Are you restricted by guidance from the local formulary? Explore awareness of current NICE guidance</i></p>                                                                                                                                |
| <p>7. What types of support or training could assist your care/prescribing for patients with moderate to severe AD?</p> <p><i>PROMPT</i></p> <p><i>Access to advice; sources of information; guidelines, training topics and formats</i></p>                                                                                                                                                                                     |
| <p>8. How does your existing relationship with a patient affect your decision-making in respect of AD?</p> <p><i>PROMPT</i></p> <p><i>Continuity of care with patient/family; no family support, mild/moderate/severe AD</i></p>                                                                                                                                                                                                 |

9. In your experience, how is shared decision making impacted by AD?

*PROMPT*

*Differences according to severity (mild, moderate, severe); involving the patient's carer, capacity issues*

10. How does your working environment affect your care/prescribing for patients with moderate to severe AD?

*PROMPT*

*Time, availability of (double) appointments, practice culture, support from specialists within and outside practice (nb PCN), access to training, possibility of dedicated dementia clinics*

11. Do you have any other comments about caring/prescribing for patients with moderate to severe AD?
